1 Contribution of the Type 6 Secretion System to Apoptosis and Macrophage Polarization During  
2 *Burkholderia pseudomallei* Infection

3

4 Jacob L. Stockton<sup>1</sup>, Nittaya Khakhum<sup>1</sup>, Alfredo G. Torres<sup>1,2\*</sup>

5

6 Department of Microbiology and Immunology<sup>1</sup>, Department of Pathology<sup>2</sup>, University of Texas  
7 Medical Branch Galveston, TX, 77555. USA

8

9 Working title: T6SS activity modifies the host response to promote infection.

10

11 \*Corresponding author: [altorres@utmb.edu](mailto:altorres@utmb.edu); phone 409 747 0189

12

13 Keywords: *B. pseudomallei*; type 6 secretion system; macrophages; apoptosis; polarization;  
14 inflammation

15

16

17

18 **Abstract**

19 *Burkholderia pseudomallei* (*Bpm*) is the causative agent of the disease melioidosis. As a  
20 facultative intracellular pathogen, *Bpm* has a complex lifestyle that culminates in cell-to-cell  
21 fusion and multinucleated giant cells (MNGCs) formation. The virulence factor responsible for  
22 MNGC formation is the type 6 secretion system (T6SS), a contractile nanomachine. MNGC  
23 formation is a cell-to-cell spread strategy that allows the bacteria to avoid the extracellular  
24 immune system and our previous data highlighted cell death, apoptosis, and inflammation as  
25 pathways significantly impacted by T6SS activity. Thusly, we investigated how the T6SS  
26 influences these phenotypes within the macrophage and pulmonary models of infection. Here we  
27 report that the T6SS is responsible for exacerbating apoptotic cell death during infection in both  
28 macrophages and the lungs of infected mice. We also demonstrate that although the T6SS does  
29 not influence differential macrophage polarization, the M2 polarization observed is potentially  
30 beneficial for *Bpm* pathogenesis and replication. Finally, we show that the T6SS contributes to  
31 the severity of inflammatory nodule formation in the lungs, which might be potentially  
32 connected to the amount of apoptosis that is triggered by the bacteria.

33  
34  
35  
36  
37  
38  
39  
40  
41  
42  
43  
44  
45  
46  
47  
48

49

## 50 **Introduction**

51 *Burkholderia pseudomallei* (*Bpm*) is a Gram-negative environmental saprophyte that is the  
52 causative agent of melioidosis (1). Melioidosis is a neglected tropical disease that affects an  
53 estimated 165,000 people, with approximately 89,000 deaths, a year (2, 3). *Bpm* was thought to  
54 be restricted to southeast Asia and northern Australia; however, it has been shown to have global  
55 distribution (3, 4). This geographical distribution includes the Americas where melioidosis is a  
56 recognized and growing public health threat (5-8). The clinical manifestations of melioidosis are  
57 highly variable, which often leads to misdiagnosis, earning *Bpm* the moniker “The Great  
58 Mimicker” (1, 9, 10). *Bpm* is a facultative intracellular pathogen that can successfully infect both  
59 phagocytic and non-phagocytic cell types and get distributed to almost every tissue in the host  
60 (11, 12). *Bpm* owes its success as an intracellular pathogen to an arsenal of virulence factors that  
61 it utilizes to invade, survive, and spread from cell-to-cell. One critical virulence factor is the type  
62 6 secretion system (T6SS), *Bpm* utilizes this nanomachine to fuse host cell membranes and  
63 generate multinucleated giant cells (MNGCs) (13-16). MNGC formation is the keystone  
64 pathogenesis feature of *Bpm* and the lack of T6SS activity results in attenuation of the bacterium  
65 (13, 17). The mechanism by which host cell membranes are fused by the T6SS and the  
66 consequence of MNGC formation, from the host perspective, are both currently unknown.

67 Previously, we began to interrogate this intracellular pathogen by performing dual RNA-  
68 seq using our established *in vitro* model of gastrointestinal (GI) infection (18, 19). During this  
69 analysis, it was found that T6SS activity contributes to modulation of inflammatory responses  
70 through NFκB and the differential expression of numerous cell death pathway genes. The  
71 primary cell death pathway highlighted was apoptosis, which is significant due to the nature of  
72 apoptosis being “immunologically silent” (20). Cells that undergo apoptosis do not release  
73 intracellular contents that would be perceived as damage associated molecular patterns (DAMPs)  
74 by the immune system and result in an inflammatory response. Apoptotic corpses are cleared by  
75 phagocytic cells to prevent secondary necrosis in a process called efferocytosis (21). Hijacking  
76 this mechanism of cell death to evade the immune system would be advantageous to the  
77 bacterium as it can continue to spread from cell-to-cell through efferocytosis under the immune  
78 silence of apoptosis. Modulation of phagocytic cell death and evasion of intracellular clearance  
79 mechanisms by *Bpm* (22, 23) and apoptosis has been implicated during infection numerous times

80 in a multitude of cell lines (24-28). Certain virulence factors have been implicated in the  
81 activation of apoptosis, including the type 3 secretion system (T3SS) (26) and BimA protein  
82 (24), however, the dual RNA-seq analysis implicated the T6SS apparatus (18). As the T6SS is  
83 downstream of both the T3SS and BimA-mediated actin motility during intracellular  
84 pathogenesis, it is likely that the T6SS is the main driver of apoptosis during infection.

85 Cell death can have a profound impact on the immune microenvironment; different  
86 modes of death can vastly change how the immune system responds. For example, pyroptosis  
87 and necroptosis release pro-inflammatory DAMPs and cytokines, which is in contrast to the  
88 silent death occurring during apoptosis (29). Both processes can impact the behavior of  
89 macrophages through the mechanism of polarization. Macrophage polarization is a phenomenon  
90 during which these immune cells get activated and skew towards pro-inflammatory (M1) or  
91 alternatively activated (M2). M2 macrophages commonly take on anti-inflammatory and  
92 homeostatic characteristics, while classically activated M1 macrophages are primarily involved  
93 in pathogen clearance and tissue damage (30). We have recently reported that *Bpm* elicits  
94 differential pulmonary macrophage polarization during infection with a *Bpm*  $\Delta bicA$  strain, a  
95 T3SS mutant. While wild-type (WT) infected mice resulted in both M1 and M2 polarization, the  
96  $\Delta bicA$  failed to generate M2 polarization (31). In this work, we evaluate the contribution of the  
97 T6SS system as an inducer of apoptosis and macrophage polarization to understand the  
98 consequences of MNGC formation and start elucidating its role in pathogenesis.

99

## 100 **Results**

### 101 The T6SS is dispensable for survival inside of macrophages.

102 To begin understanding how T6SS activity affects apoptosis and polarization, we first established  
103 how our T6SS mutant,  $\Delta hcp1$  (BPSS1498), replicated inside of macrophages. Hcp1 is the most  
104 prevalent structural protein of the T6SS and hexamerizes to form the inner sheath of the  
105 injectosome, deletion of *hcp1* ablates MNGC formation while attenuating the bacterium during  
106 *in vivo* infections (13, 15). We chose to evaluate intracellular survival in two macrophage  
107 models: RAW 264.7 cells and BALB/c bone marrow-derived macrophages (BMDMs). As RAW  
108 264.7 cells were initially derived from BALB/c mice, we chose the same background for the  
109 primary BMDMs. Unlike the previously characterized regulatory mutant  $\Delta bicA$  (31), the  $\Delta hcp1$   
110 strain did not display an intracellular survival defect in either macrophage model (**Fig 1A-B**).

111 The  $\Delta hcp1$  strain does appear to survive significantly better than the WT or complemented  
112  $\Delta hcp1::hcp1$  strains in the RAW 264.7 model but the mechanism behind this phenotype remains  
113 unclear (**Fig 1A**). Together, these data suggest that although the T6SS is critical for virulence, it  
114 is dispensable for replication within macrophages.

115

#### 116 T6SS activity exacerbates apoptosis in macrophages and during *in vivo* infection.

117 To evaluate apoptosis, we utilized flow cytometry to measure the externalization of  
118 phosphatidylserine (PS) via Apotracker dye paired with a live/dead (L/D) viability dye. This  
119 allows for the differentiation between apoptotic death (Apotracker +, L/D +/-) and necrotic forms  
120 of cell death (Apotracker -, L/D+). We performed an infection time course in RAW 264.7 cells  
121 and measured the percentage of macrophages that were apoptotic (Apotracker +) at 3-, 6-, 8-, and  
122 12-hours post infection (hpi) (**Fig 2A-E**). Beginning at 6 hpi, WT infection results in  
123 significantly more apoptotic cells (**Fig 2B & E**), and by 8 hpi and 12 hpi all infection groups had  
124 high levels of apoptosis events (**Fig 2 C-E**). Although  $\Delta hcp1$  had increased apoptosis compared  
125 to mock infected cells, WT and  $\Delta hcp1::hcp1$  demonstrated a dramatic increase over  $\Delta hcp1$  at  
126 both 8 and 12 hpi. High amounts of intracellular replication results in a robust apoptotic  
127 response, however, T6SS activity exacerbates apoptosis in macrophages.

128 With the T6SS-exacerbated apoptosis phenotype established *in vitro*, we wanted to assess  
129 apoptosis in murine lungs during pulmonary melioidosis. BALB/c mice intranasally challenged  
130 with  $\Delta hcp1$  demonstrated 100% survival, confirming what has previously been reported (13). As  
131 expected, WT and  $\Delta hcp1::hcp1$  challenged groups saw complete lethality (**Fig 3A**). The  $\Delta hcp1$   
132 infected mice exhibited minimal weight loss and were mostly clear of persistent infection on day  
133 21 post infection (**Fig 3B & C**). We selected 48 h post infection to assess pulmonary apoptosis  
134 due to the disparity in disease severity observed between WT/ $\Delta hcp1::hcp1$  and  $\Delta hcp1$  at this  
135 time point. As such, another set of BALB/c mice were challenged, lungs were removed and  
136 TUNEL staining was performed to detect apoptosis. WT and  $\Delta hcp1::hcp1$  infected lungs  
137 exhibited intense TUNEL signal, while  $\Delta hcp1$  infected lungs displayed intermediate amounts of  
138 staining (**Fig 4**). This recapitulates what was seen *in vitro* (**Fig 2A-E**) with the  $\Delta hcp1$  strain  
139 eliciting a small to moderate amount of apoptosis, while an active T6SS triggers large scale  
140 apoptosis.

141

142 *Bpm* infection triggers *in vitro* macrophage polarization independent of T6SS.

143 We previously established that *Bpm* elicits both M1 and M2 polarization *in vivo* but the M2  
144 population was BicA-dependent (31). As BicA is involved in T3SS-mediated virulence and thus  
145 the *bicA* mutant has an intracellular survival defect, we sought to understand if the differential  
146 polarization is dependent on just intracellular survival or requires a functional T6SS. Therefore,  
147 RAW 264.7 cells were infected, and at 8 hpi, were stained with markers for polarization: CD80,  
148 CD86 (M1) and CD163, Arginase-1 (M2). In this assay, cell populations that are CD80+ are  
149 being considered M1 while populations that are Arg-1+ are M2. Surprisingly, there was no  
150 significant difference in M2 polarization across the infection groups (**Fig 5A & C**) with only WT  
151 *Bpm* demonstrating an increase over mock infected cells. WT did trend higher than  $\Delta hcp1$  on  
152 average but due to variability in the samples, this was not significant. All infection groups  
153 generated a consistent and robust M1 response (**Fig 5 B & D**). The mock infected group did  
154 exhibit a sizable amount of residual CD80 staining, however, there was a distinct shift in  
155 intensity upon infection. This result suggests that infection with an intracellular survival  
156 competent strain is enough to trigger both pro-inflammatory and alternative effector functions in  
157 macrophages and does not require of a functional T6SS.

158

159 M2 polarization promotes intracellular survival of *Bpm*.

160 The advantages and disadvantages of macrophage polarization for *Bpm* are unclear, as different  
161 bacterial pathogens skew polarization one way or the other to promote infection (32). To address  
162 this dichotomy, RAW 264.7 cells were pre-polarized to M1 (IFN $\gamma$  + LPS) or M2 (IL-4) prior to  
163 infection and intracellular survival was assessed and compared to an M0 control (**Fig 6A-B**). M2  
164 macrophages had decreased relative phagocytic capacity compared to M0 (**Fig 6A**) and increased  
165 intracellular survival at 3 hpi compared to both M1- and M0-polarized cells (**Fig 6B**).  
166 Interestingly, M1 polarization showed no significant advantage on bacterial clearance as  
167 compared to M0. These data further suggest that M2 skewing by *Bpm* might be offering an  
168 advantage during infection and is potentially an example of hijacking the host response to  
169 promote pathogenesis and replication.

170

171 *Bpm* infection triggers *in vivo* macrophage polarization independent of T6SS.

172 After examining the relationship between the T6SS and macrophage polarization *in vitro*, we  
173 assessed the role of the T6SS in macrophage polarization *in vivo*. BALB/c mice were intranasally  
174 challenged with WT,  $\Delta hcp1$ , or  $\Delta hcp1::hcp1$  and at 48 hpi lungs were removed and processed for  
175 flow cytometry. We devised a comprehensive panel (**Table 1**) and gating strategy adapted from  
176 (33) and previously utilized in (31) (**Fig S1**) to interrogate macrophage activity within the lungs.  
177 We are denoting macrophages as cells that are MHCII<sup>+</sup> and F4/80<sup>+</sup> after being filtered through  
178 gating and cells within that population as M1-like (CD80<sup>+</sup> and CD86<sup>+/-</sup>) or M2-like (Arginase-  
179 1<sup>+</sup> and CD163<sup>+</sup>). We found that although  $\Delta hcp1$  is drastically attenuated *in vivo*, there was no  
180 difference in macrophage recruitment to the lungs during infection (**Fig 7A & B**). When  
181 examining the activation states of pulmonary macrophages, we found no difference in M1-like or  
182 M2-like macrophages (**Fig 7C & D**), however, there was a distinct downward shift in the  
183 intensity of CD80 staining in  $\Delta hcp1$  (**Fig 7A**).

184

#### 185 Inflammatory nodules predictive of M2 polarization but not T6SS-dependent

186 Previously, we observed that the presence of an M2 macrophage population in the lungs  
187 correlated with distinct inflammatory nodules (31). We examined H & E-stained lungs from  
188 infected BALB/c mice infected at 48 hpi for the presence or absence of this pathological feature.  
189 We found that all strains generated inflammatory nodules (**Fig 8**). However, even though the  
190  $\Delta hcp1$  strain generated these nodules, they were smaller and less numerous compared to WT and  
191  $\Delta hcp1::hcp1$  strains. The WT and  $\Delta hcp1::hcp1$ -associated nodules appear to have more cellular  
192 debris compared to  $\Delta hcp1$  but the cellular content of each nodule is currently unknown. We  
193 hypothesize that the nodules are likely primary replication hot spots for *Bpm* within the lungs of  
194 infected animals.

195

#### 196 Discussion

197 Melioidosis is a neglected tropical disease that is a looming global public health threat (2, 3). As  
198 a facultative intracellular pathogen, *Bpm* deploys an arsenal of virulence factors to successfully  
199 survive and replicate within the host cells (1, 4). One critical virulence factor is the T6SS, an  
200 injectosome apparatus that *Bpm* utilizes to fuse host membranes and generate MNGCs. MNGC  
201 formation is the keystone pathogenesis event and T6SS mutants are highly attenuated *in vivo*  
202 (13). The mechanisms of T6SS-mediated pathogenesis and the impact that MNGC formation has

203 on the host response is currently poorly understood. Previously, our laboratory sought to  
204 illuminate the impact of the T6SS on host response via dual RNA-seq in our *in vitro* model of GI  
205 infection (18). This analysis revealed that in the absence of the T6SS, there is substantial  
206 differential expression in pathways that are involved in inflammation, cell death, and apoptosis.  
207 The differential expression of inflammation pathways was validated by demonstrating that there  
208 is a T6SS-dependent blockage of NF $\kappa$ B activation, even after priming with TNF $\alpha$ . This work  
209 was done in primary murine intestinal epithelial cells, and it is currently unclear how this model  
210 translates to other models of infection. Therefore, to investigate how the T6SS participates in the  
211 inflammation process and cell death, we chose the *in vitro* macrophage system and the intranasal  
212 infection model to perform *in vivo* studies. Respiratory involvement is one of the most common  
213 clinical presentations of melioidosis and can progress into necrotizing pneumonia, making the  
214 intranasal model of infection particularly useful and relevant to study (1). Macrophages are a  
215 primary replicative niche for *Bpm* and are omnipresent in all host tissues, circulating or as tissue  
216 resident sentinels (11, 34). They are an attractive target for *Bpm* to manipulate as they are  
217 integral in the immune response to infection, and we have previously shown that *Bpm* is capable  
218 of differentially activating macrophages (31).

219 We first needed to establish how the T6SS affects intracellular survival within  
220 macrophages, as other secretion system mutants exhibit intracellular defects (18, 31, 35). We  
221 chose two different macrophage models to evaluate intracellular survival: RAW 264.7 cells, an  
222 immortalized murine macrophage cell line, and bone marrow-derived macrophages harvested  
223 from BALB/c mice. RAW 264.7 cells were initially collected from a BALB/c background, so we  
224 selected the same genetic background for our primary model. We found that, unlike the T3SS,  
225 the T6SS is dispensable for replication within both immortalized and primary macrophages (**Fig**  
226 **1A & B**). There was a significant increase in intracellular survival of  $\Delta hcp1$  in RAW 264.7 cells  
227 that was not observed in the primary BMDMs. One possibility for this result is that RAW 264.7  
228 cells lack the inflammasome adapter protein, ASC, which limits the ability of the NLRP3  
229 inflammasome. However, it has been demonstrated that BMDMs lacking ASC do not facilitate  
230 increased replication of *Bpm* (36).

231 We then evaluated the contribution of the T6SS to apoptosis of RAW 264.7 cells during  
232 infection. We found that although  $\Delta hcp1$  triggered increased apoptosis as compared to the mock  
233 infected macrophages, WT and  $\Delta hcp1::hcp1$  infected RAW cells exhibited very high proportions



234 of apoptotic cells (**Fig 2A-E**). The increased viability of  $\Delta hcp1$  at 12 hpi (**Fig 2D & E**) helps  
235 explain the increased intracellular survival in **Fig 1A** as dead and dying cells release the bacteria  
236 into the media containing kanamycin. This increase in apoptosis between 6 and 8 hpi correlates  
237 with the historical timeline of MNGC formation and thus is likely the driving force behind the  
238 rise in apoptosis. As this is an *in vitro* system, we wanted to evaluate the consistency of this  
239 phenotype *in vivo* using an intranasal challenge model using BALB/c mice. The attenuation of  
240  $\Delta hcp1$  has been previously documented (13), however, we needed to confirm the restoration of  
241  $\Delta hcp1::hcp1$  *in vivo*. We found that  $\Delta hcp1::hcp1$  recapitulates WT virulence during intranasal  
242 challenge (**Fig 3A & B**) while  $\Delta hcp1$  remained attenuated. At day 21 post infection, the  $\Delta hcp1$   
243 survivors had predominantly cleared the infection, with only a couple animals harboring small  
244 numbers of bacteria (**Fig 3C**). We chose to evaluate pulmonary apoptosis at 48 hpi as there is a  
245 distinct disparity in weight loss (a predictor of disease severity) between  $\Delta hcp1$  and  
246 WT/ $\Delta hcp1::hcp1$  (**Fig 3B**). TUNEL staining was used to evaluate apoptosis, and paraffin  
247 embedded lung sections from 48 hpi were probed with TUNEL and a DNA counter stain and  
248 imaged to visualize relative amounts of apoptosis within the lungs (**Fig 4**). Much like the *in vitro*  
249 assay,  $\Delta hcp1$  elicits small amounts of apoptosis but WT and  $\Delta hcp1::hcp1$  trigger much higher  
250 and more widely distributed TUNEL signal (**Fig 4**). The *in vitro* and *in vivo* apoptosis  
251 phenotypes being nearly identical suggests that T6SS-mediated exacerbation of apoptosis is not a  
252 macrophage specific phenomenon but is a common mechanism across phagocytic and non-  
253 phagocytic cell types. There are two signaling pathways that converge on caspase-3 activation  
254 and apoptosis; the extrinsic pathway, that is initiated through an external death receptor, and the  
255 intrinsic pathway, that is triggered by internal cellular damage and release of specific  
256 mitochondrial molecules (20). The intrinsic pathway is the obvious candidate for *Bpm*-mediated  
257 apoptosis due the massive cellular trauma caused by MNGC formation. Intracellular damage,  
258 like that caused by cell fusion and ineffective ROS, is an intrinsic lethal stimulus that triggers  
259 caspase-9 mediated apoptosis. Common ligands for the extrinsic pathway are TNF $\alpha$ , Fas-L, and  
260 TRAIL, *Bpm* has been shown to shut down NF $\kappa$ B which is a driver of TNF $\alpha$  production. The  
261 likelihood of extrinsic activation is lower than intrinsic, but the expression of the specific  
262 molecules is unknown. However, it has also been demonstrated that splenic  
263 monocytes/macrophages from heavily colonized mice produce increased levels of TNF $\alpha$  and that

264 correlated with increasing severity of pyogranulomatous lesions on the spleen (37). There is  
265 established crosstalk between the two pathways, specifically, caspase-8 cleavage of BID leading  
266 to cytochrome C release from the mitochondria and activation of the intrinsic “apoptosome”, a  
267 multimeric structure that acts as a scaffold for caspase-9 activity (38, 39). Future studies are  
268 needed to ultimately determine the signaling cascade that is involved in *Bpm*-mediated apoptosis  
269 and if there is a cell type specific contribution to the microenvironment that influences this  
270 phenotype.

271 We next evaluated how the T6SS affects the base inflammation state of macrophages *in*  
272 *vitro* via assessing the expression of polarization markers on infected RAW 264.7 cells. For this  
273 assay, an M1 macrophage is denoted as CD80<sup>+</sup> and CD86<sup>+/-</sup> while an M2 macrophage is Arg-1<sup>+</sup>  
274 and CD163<sup>+/-</sup>. The 8 hpi time point was selected due to the difference in the apoptosis  
275 phenotype between *Δhcp1* and WT/*Δhcp1::hcp1* and, although not directly measured,  
276 comparable intracellular survival. Although WT exhibited a significant increase in M2  
277 macrophages over mock, there was no difference across the infection groups (**Fig 5A & C**). This  
278 phenotype was highly variable in the infection groups, especially within cells infected with  
279 *Δhcp1*. On the other hand, M1 polarization was highly consistent across infection groups and all  
280 strains elicited a highly significant increase over mock (**Fig 5B & D**). Mock infected RAW 264.7  
281 cells exhibited moderate basal CD80 expression, however, upon infection there was a distinct  
282 shift in intensity that is indicative of M1 polarization. The near complete M1 polarization tells us  
283 that the pro-inflammatory activation is the primary response to infection and that is not  
284 dependent on T6SS activity. The M2 response appears to be less evident and a secondary  
285 reaction to infection. Such activation state is highly variable and potentially is a response to the  
286 apoptosis that is occurring during infection. Traditionally, apoptotic corpses are cleared by  
287 phagocytes and anti-inflammatory molecules are released to avoid unnecessary inflammatory  
288 damage and to maintain homeostasis, a process that is called efferocytosis (21, 40). M2  
289 polarization by *Bpm* might be incidental, an indirect response to apoptosis, but it still could be  
290 beneficial to the pathogen by creating a more permissive environment for replication. To address  
291 the question of whether macrophage polarization is beneficial to *Bpm*, we pre-polarized RAW  
292 264.7 cells and infected with WT *Bpm* to evaluate intracellular survival. The M1 cells were  
293 pretreated with IFN $\gamma$  and LPS while M2 cells were pretreated with IL-4, and expression of  
294 M1/M2 markers were validated prior to infection (data not shown). The phagocytic capacity of

295 M1 and M2 macrophages was compared to mock treated M0 macrophages, and we found that  
296 M2s have a decreased phagocytic capacity compared to M0s (**Fig 6A**). Intracellular survival was  
297 assessed at 3 hpi and although M2s had a decreased phagocytic capacity, they facilitated  
298 increased intracellular survival compared to M1s and M0s (**Fig 6B**). This suggests that M2  
299 polarization is a beneficial replication environment for *Bpm* and M1 polarization is  
300 inconsequential during infection. It should be noted that this phenotype is within the context of  
301 an *in vitro* infection of monocultured cells, and within the *in vivo* environment, this is more  
302 complex with multiple cell types contributing to the immune landscape during infection.

303 To incorporate the complexities of a multicellular immune system, we evaluated  
304 macrophage polarization in the lungs of infected mice at 48 hpi. Lungs were collected,  
305 processed, and total pulmonary macrophages and M1/M2 polarization within that population of  
306 pulmonary macrophages were evaluated (**Fig 7A**). We found that there was no difference in total  
307 macrophages present in the lungs at 48 hpi (**Fig 7B**). When we evaluated the expression of our  
308 polarization markers, we found no differences in M1 (**Fig 7C**) or M2 (**Fig 7D**) macrophages  
309 across the infection groups. This matches what was observed *in vitro* (**Fig 5A-D**). We previously  
310 reported that WT *Bpm* elicited an M2 population along with inflammatory nodules within the  
311 lungs (31) so we evaluated lung pathology at 48 hpi to determine if these inflammatory nodules  
312 were T6SS-dependent. We found that, although they were smaller and less numerous,  $\Delta hcp1$   
313 infection resulted in the formation of inflammatory nodules (**Fig 8**). The structure of  $\Delta hcp1$ -  
314 associated nodules was distinct from WT/ $\Delta hcp1::hcp1$ , lacking the cellular debris and segmented  
315 appearance that has been observed numerous times in WT infections, both in murine and human  
316 infections (31, 37, 41). This confirms that M2 macrophages are associated with these  
317 inflammatory nodules; however, a functional T6SS might contribute to the complexity of these  
318 nodules.

319 Apoptotic cell death has been described as “immunologically silent” because it does not  
320 trigger a pro-inflammatory response from the phagocytic cells tasked with clearing the corpse. It  
321 has long been hypothesized that *Bpm* uses MNGC formation as a mechanism of cell-to-cell  
322 spread to prevent interacting with the external milieu and apoptosis is simply a by-product of  
323 MNGC formation. Our data begin to suggest that perhaps apoptosis is a purposeful immune  
324 evasion mechanism that *Bpm* uses to avoid triggering an effective pathogen clearing response.  
325 The robust M1 response, that occurs both *in vitro* and *in vivo*, is not effective at bacterial

326 clearance at first glance. There is a possibility that in the absence of cell-to-cell spread and  
327 apoptosis, this M1 response is productive and can eliminate bacteria that have limited cell-to-cell  
328 mobility ( $\Delta hcp1$ ). The correlation of M2 macrophages and the inflammatory nodule pathology  
329 might suggest that the M2 polarization is a response to tissue damage caused by the pro-  
330 inflammatory response and bacterial replication. More work needs to be done understanding  
331 which M2 subtype(s) are present inside the lung as that can shed light on their activity, as well as  
332 positioning where both M1 and M2 macrophages are in relation to the inflammatory nodules  
333 which might be working as replication hotspots.

334 In summary, we explored the contribution of the *Bpm* T6SS to inflammation and cell  
335 death during infection. We demonstrated that the T6SS participates as the driver of apoptosis in  
336 macrophages and within the lung but does not result in differential macrophage polarization  
337 compared to WT. The increase in inflammatory nodule severity correlated with apoptosis in the  
338 lungs, suggesting that triggering apoptosis is advantageous for pathogenesis.

339

## 340 **Materials and Methods**

### 341 **Bacterial strains and growth conditions**

342 All experiments were conducted with the prototypical wild-type strain of *B. pseudomallei*  
343 K96243 or derivative strains ( $\Delta hcp1$  ( $\Delta$ BPSS1498) (42),  $\Delta hcp1::hcp1$ ). All *Bpm* strains were  
344 routinely grown at 37°C on LB agar plates and in LB broth with shaking. *Escherichia coli* S17-1  
345  $\lambda$ pir were grown in LB agar plates and broth at 37°C, and Kanamycin was added for plasmid  
346 selection. For the counter selection, co-integrants were grown in YT medium supplemented with  
347 15% sucrose.

348

### 349 **Construction of *hcp1* strain complementation**

350 The *in cis* complementation of the *Bpm hcp1* mutant was performed by inserting the *hcp1* gene  
351 back into *Bpm*  $\Delta hcp1$  strain via allelic exchange using *Burkholderia* optimized vector pMo130  
352 (42). Purified PCR amplicon of upstream-BPSS1498-downstream and pMo130 vector were  
353 digested by NheI and HindIII restriction enzyme followed by ligation. The ligated DNA was  
354 transformed to *E. coli* S17-1  $\lambda$ pir donor strain. The upstream-BPSS1498-downstream/pMo130  
355 plasmid was introduced into *Bpm*  $\Delta hcp1$  strain by biparental mating as described elsewhere (18).

356 The clonal selection of complemented *Bpm hcp1* mutant was confirmed by PCR and sequencing  
357 at GENEWIZ.

358

### 359 **Macrophage culture conditions and infection assays**

360 RAW 264.7 cells (ATCC TIB-71) were grown in Gibco Dulbecco's Modified Eagle Medium  
361 (DMEM) plus 10% heat-inactivated fetal bovine serum (Gibco), 100 U/mL penicillin, and 100  
362 µg/mL streptomycin (Gibco) at 37°C with 5% CO<sub>2</sub>. RAW 264.7 cells were maintained in T-75  
363 flasks (Corning), detached using Accutase cell detachment solution (Biolegend) and seeded into  
364 12 or 24 well plates (Corning). Bone marrow was collected from the femur and tibia of female  
365 BALB/c mice (Jackson Laboratories), RBCs lysed (Invitrogen 10x RBC Lysis buffer), and cells  
366 were added to polystyrene petri dishes (Sigma, 100mm x 20mm) containing RPMI 1640 w/ L-  
367 glutamine and HEPES (Gibco) plus 5 µM sodium pyruvate (Sigma), 100 U/mL penicillin, 100  
368 µg/mL streptomycin (Gibco), 10% heat-inactivated fetal bovine serum (Gibco), and 25 ng/mL  
369 M-CSF (Biolegend). Cells were incubated at 37°C with 5% CO<sub>2</sub> for 5 days with media changes  
370 on days 3 and 5. The resulting adherent cells were detached from the petri dishes using Accutase  
371 cell detachment solution (Biolegend) and seeded into 12 or 24 well plates (Corning) for further  
372 use.

373 RAW 264.7 cells or BMDMs were seeded at  $5 \times 10^5$ /well in complete DMEM or RPMI  
374 without antibiotics into 24 well-plates and allowed to adhere overnight. *Bpm* strains were  
375 streaked on LB agar plates, grown at 37°C for 48 h, LB broth was inoculated and grown at 37°C  
376 with shaking for 12 h. Bacterial culture was diluted to  $5 \times 10^6$  CFU/mL in antibiotic free  
377 complete DMEM or RPMI and added to the cells for an MOI of 10. Cells were incubated with  
378 inoculum for 1 h for internalization, washed with PBS, and then media containing 500 µg/mL  
379 kanamycin was added to kill off extracellular bacteria. For bacterial enumeration, cells were  
380 washed twice with PBS to remove any extracellular bacteria, lysed with 0.1% TritonX-100,  
381 serially diluted in PBS, and plated on LB agar plates.

382

### 383 ***In vitro* evaluation of apoptosis**

384 RAW 264.7 cells were seeded at  $2 \times 10^6$ /well in 6 well plates and infected as described above  
385 and the infection was allowed to progress for 3, 6, 8, or 12 h. At the defined timepoint, cells were  
386 washed with PBS, removed from the well using Accustase, and pelleted in a PBS wash at 500 xg

387 for 5 min. Cells were resuspended in 400 nM Apotracker Green (Biolegend) and incubated for 15  
388 min before adding 1 mL of Zombie NIR (1/10,000 in PBS) for 5 min. Stained cells were washed  
389 in FACS buffer and fixed with 4% ultrapure formaldehyde for 48 h at 4°C before removal from  
390 BSL3. Analysis was done on a BD Symphony full spectrum flow cytometer. Data were analyzed  
391 using FlowJo software.

392

### 393 **Intranasal challenge and survival studies**

394 Female 6–8-week-old BALB/c mice (n = 5/group) (Jackson Laboratories) were intranasally (i.n.)  
395 challenged with 3-5 LD<sub>50</sub> *Bpm* K96243,  $\Delta hcp1$ , or  $\Delta hcp1::hcp1$  in 50  $\mu$ L (25  $\mu$ L/nare). One LD<sub>50</sub>  
396 is equal to 312 CFU. Infected mice were monitored for survival and weight loss for 21 days post-  
397 infection and euthanized if the animal reached the threshold for humane endpoint. On day 21  
398 post-infection, survivors were humanely euthanized, and lungs, liver, and spleen were collected  
399 for bacterial enumeration.

400

### 401 **TUNEL Staining**

402 Female 6–8-week-old BALB/c mice (n = 5/group) (Jackson Laboratories) were intranasally (i.n.)  
403 challenged with 3-5 LD<sub>50</sub> *Bpm* K96243,  $\Delta hcp1$ , or  $\Delta hcp1::hcp1$  in 50  $\mu$ L (25  $\mu$ L/nare). At 48 hpi,  
404 lungs were removed and fixed in 10% buffered formalin for 48 h before removal from BSL3.  
405 Lungs were sent to the UTMB Anatomical Pathology core for paraffin embedding and mounting  
406 on slides. Mounted lung sections were deparaffinized, TUNEL stained according to the included  
407 assay protocol in the Click-iT™ Plus TUNEL assay Alexa Fluor 594 kit (Invitrogen), and then  
408 stained with Hoescht 33342 (ThermoFisher) to highlight nuclei. Stained slides were imaged  
409 using an Echo Revolve microscope.

410

### 411 ***In vitro* polarization assay**

412 RAW 264.7 cells were seeded at  $2 \times 10^6$ /well in 6 well plates and infected as previously  
413 described and the infection was allowed to progress for 8 h. At the end point, the cells were  
414 removed from the well via Accutase and washed in PBS before staining for flow cytometry.  
415 Briefly, cells were incubated with Zombie NIR (Biolegend) for 5 min in PBS, washed, and  
416 incubated with TruStain X plus (Biolegend) for 30 min followed by the extracellular antibodies  
417 (CD80, CD86, and CD163). Cells were fixed and permeabilized using Cytotfix/Cytoperm (BD

418 Biosciences) and stained for intracellular arginase-1. Stained cells were fixed with 4% ultrapure  
419 formaldehyde for 48 h at 4°C before removal from BSL3. Analysis was done on a BD Symphony  
420 full spectrum flow cytometer. Data were analyzed using FlowJo software.

421

#### 422 **Pre-polarization of RAW 264.7 cells**

423 RAW 264.7 cells were seeded at  $1 \times 10^6$  cells/well in 12 well plates and allowed to adhere  
424 overnight. After adherence, polarization media containing either 50 ng/mL IFN $\gamma$   
425 (MilliporeSigma) + 50 ng/mL LPS (MilliporeSigma) for M1 or 40 ng/mL IL-4 (MilliporeSigma)  
426 for M2 was added for 24 h. M0 cells were treated with mock polarization media containing an  
427 equitable amount of DMSO for 24 h. This protocol was validated via flow cytometry (data not  
428 shown) before progressing to infection assays.

429

#### 430 **Flow cytometry**

431 Female 6–8-week-old BALB/c mice (n = 5/group) (Jackson Laboratories) were i.n. challenged  
432 with 3-5 LD<sub>50</sub> *Bpm* K96243,  $\Delta hcp1$ , or  $\Delta hcp1::hcp1$ ; at 48 hpi, animals were euthanized, and  
433 lungs harvested for processing. Lung tissue was cut into small pieces and dissociated via  
434 incubation for 30 min at 37°C with slight rocking in RPMI plus 0.5 mg/mL collagenase IV and  
435 30  $\mu$ g/mL DNase I. The dissociated tissue was homogenized through a 100  $\mu$ m cell strainer and  
436 fibroblasts and debris was pelleted via a 60 xg centrifugation for 1 min. Supernatant was  
437 collected and RBCs were lysed for 5 min at RT. Following washes, pulmonary cells were  
438 adjusted to  $1 \times 10^6$  cells and stained using the reagents in Table 1. Briefly, cells were incubated  
439 with Zombie NIR (Biolegend) for 5 min in PBS, washed, and incubated with TruStain X plus  
440 (Biolegend) for 30 min followed by the extracellular antibodies (Table 1). Cells were fixed and  
441 permeabilized using Cytotfix/Cytoperm (BD Biosciences) and stained for intracellular markers.  
442 Fully stained cells were resuspended in 4% ultrapure formaldehyde in PBS for 48 h in  
443 accordance with the inactivation protocol approved by UTMB Department of Biosafety before  
444 removal from BSL3 laboratory for analysis via BD Symphony full spectrum flow cytometer.  
445 Data were analyzed using FlowJo software.

446

447 **Table 1.** Flow cytometry antibodies and reagents

| <b>Antibody/Reagent</b>          | <b>Company</b> |
|----------------------------------|----------------|
| TruStain FcX PLUS                | BioLegend      |
| Zombie NIR Fixable Viability Dye | BioLegend      |
| CD45-FITC                        | BioLegend      |
| CD11b-BV785                      | BioLegend      |
| CD11c-BUV395                     | BD Biosciences |
| MHCII-BV510                      | BioLegend      |
| CD64-PE Dazzle                   | BioLegend      |
| SiglecF-APC                      | BioLegend      |
| F4/80-PE Cy7                     | BioLegend      |
| CD24-BUV737                      | Thermo Fisher  |
| CD80-BV421                       | Thermo Fisher  |
| CD86-PercpCy5.5                  | BioLegend      |
| CD163-SB600                      | Thermo Fisher  |
| Arginase1-PE                     | Thermo Fisher  |
| Apotracker Green                 | Biolegend      |

448

#### 449 **Lung pathology**

450 Lungs were collected from mice after humane euthanasia 48 h post-infection and fixed in 10%  
451 formalin for 48 h. Formalin fixed lung samples were submitted to the UTMB Anatomical  
452 Pathology core for paraffin embedding, mounting, and H&E staining. Slides were imaged using  
453 an Olympus BX51 microscope.

454

#### 455 **Ethics statement**

456 All manipulations of *B. pseudomallei* were conducted in CDC/USDA-approved and registered  
457 BSL3 facilities at the University of Texas Medical Branch (UTMB) in accordance with approved  
458 BSL3 standard operating practices. The animal studies at UTMB were carried out humanely in  
459 strict accordance with the recommendations in the Guide for the Care and Use of Laboratory  
460 Animals by the National Institutes of Health. The protocol (IACUC no. 0503014E) was  
461 approved by the Animal Care and Use Committee of UTMB.

462



463 **Statistical analysis**

464 All statistical analysis was done using GraphPad Prism software (v9.0). P-values of < 0.05 are  
465 considered statistically significant. Survival differences were assessed via Kaplan-Meier survival  
466 curve followed by a log-rank test. An ordinary one-way ANOVA followed by Tukey's post hoc  
467 test was used to analyze differences in intracellular replication and flow cytometry populations.

468

469 **Acknowledgments**

470 This work was funded by USDA APHIS AP20VSD&B000C087. JLS is supported by a USDA  
471 APHIS NBAF Scientist Training Program Fellowship. We would like to thank Meredith Weglarz  
472 in the UTMB Flow Cytometry Core for the expertise and help in designing and implementing the  
473 flow cytometry experiments. We would also like to thank Alex Badten for his help during animal  
474 experiments, Dr. Alison Coady for allowing us to utilize her Echo Revolve microscope, and  
475 Paige Diaz for training and troubleshooting on the Echo microscope.

476

## 477 **References**

- 478 1. Wiersinga WJ, Virk HS, Torres AG, Currie BJ, Peacock SJ, Dance DAB, D. L. 2018.  
479 Melioidosis. . Nat Rev Dis Primers 4:17107.
- 480 2. Savelkoel J, Dance DAB, Currie BJ, Limmathurotsakul D, Wiersinga WJ. 2022. A call to  
481 action: time to recognise melioidosis as a neglected tropical disease. Lancet Infect Dis  
482 22:e176-e182.
- 483 3. Limmathurotsakul D, Golding N, Dance DA, Messina JP, Pigott. D M, Moyes CL, Rolim  
484 DB, Bertherat E, Day NP, Peacock SJ, Hay SI. 2016. Predicted global distribution of  
485 *Burkholderia pseudomallei* and burden of melioidosis. Nat Microbiol 1:15008.
- 486 4. Meumann EM, Limmathurotsakul D, Dunachie SJ, Wiersinga WJ, Currie BJ. 2024.  
487 *Burkholderia pseudomallei* and melioidosis. Nat Rev Microbiol 22:155-169.
- 488 5. Rolim DB, Lima RXR, Ribeiro AKC, Colares RM, Lima LDQ, Rodríguez-Morales AJ,  
489 Montúfar FE, Dance DAB. 2018. Melioidosis in South America. Trop Med Infect Dis  
490 3:60.
- 491 6. Hall CM, Jaramillo S, Jimenez R, Stone NE, Centner H, Busch JD, Bratsch N, Roe, C.C.  
492 , Gee JE, Hoffmaster AR, Rivera-Garcia S, Soltero F, Ryff K, Perez-Padilla J, Keim P,  
493 Sahl JW, Wagner DM. 2019. *Burkholderia pseudomallei*, the causative agent of  
494 melioidosis, is rare but ecologically established and widely dispersed in the environment  
495 in Puerto Rico. PLoS Negl Trop Dis 13:e0007727.
- 496 7. Cossaboom CM, Marinova-Petkova A, Stryko J, Rodriguez G, Maness T, Ocampo J,  
497 Gee JE, Elrod MG, Gulvik CA, Liu L, Bower WA, Hoffmaster AR, Blaney DD, Salzer  
498 JS, Yoder JS, Mattioli MC, Sidwa TJ, Ringsdorf L, Morrow G, Ledezma, E. , Kieffer A.  
499 2020. Melioidosis in a Resident of Texas with No Recent Travel History, United States.  
500 Emerg Infect Dis 26:1295-1299.
- 501 8. Torres AG. 2023. The public health significance of finding autochthonous melioidosis  
502 cases in the continental United States. PLoS Negl Trop Dis 17:e0011550.
- 503 9. Garg R, et al., Shaw T, Vandana KE, Magazine R, Mukhopadhyay C. 2020. Melioidosis  
504 In Suspected Recurrent Tuberculosis: A disease in disguise. J Infect Dev Ctries 14:312-  
505 316.
- 506 10. Ninan F, Mishra AK, John AO, Iyadurai R. 2018. Splenic granuloma: Melioidosis or  
507 Tuberculosis? J Family Med Prim Care 7:271-273.
- 508 11. Jones AL, Beveridge TJ, Woods DE. 1996. Intracellular survival of *Burkholderia*  
509 *pseudomallei*. Infect Immun 64:782-790.
- 510 12. Whiteley L, Meffert T, Haug M, Weidenmaier C, Hopf V, Bitschar K, Schitteck B, Kohler  
511 C, Steinmetz I, West TE, Schwarz S. 2017. Entry, Intracellular Survival, and  
512 Multinucleated-Giant-Cell-Forming Activity of *Burkholderia pseudomallei* in Human  
513 Primary Phagocytic and Nonphagocytic Cells. Infect Immun 85:e00468-17.
- 514 13. Burtnick, M.N. , et al. 2011. The cluster 1 type VI secretion system is a major virulence  
515 determinant in *Burkholderia pseudomallei*. Infect Immun 79:1512-1525.
- 516 14. Toesca IJ, French CT, Miller JF. 2014. The Type VI secretion system spike protein VgrG5  
517 mediates membrane fusion during intercellular spread by *pseudomallei* group  
518 *Burkholderia* species. Infect Immun 82:1436-1444.
- 519 15. Lennings J, West TE, Schwarz S. 2019. The Burkholderia Type VI Secretion System 5:  
520 Composition, Regulation and Role in Virulence. Frontiers Microbiol 10:3339.
- 521 16. Coulthurst S. 2019. The Type VI secretion system: a versatile bacterial weapon.  
522 Microbiology (Reading) 165:503-515.

- 523 17. Hopf V, Göhler A, Eske-Pogodda K, Bast A, Steinmetz I, Breitbach K. 2014. BPSS1504,  
524 a cluster 1 type VI secretion gene, is involved in intracellular survival and virulence of  
525 *Burkholderia pseudomallei*. Infect Immun 82:2006-2015.
- 526 18. Sanchez-Villamil JI, Tapia D, Khakhum N, Widen SG, Torres AG. 2022. Dual RNA-seq  
527 reveals a type 6 secretion system-dependent blockage of TNF- $\alpha$  signaling and BicA as a  
528 *Burkholderia pseudomallei* virulence factor important during gastrointestinal infection.  
529 Gut Microbes 14:2111950.
- 530 19. Sanchez-Villamil JI, Tapia D, Borlee GI, Borlee BR, Walker DH, Torres AG. 2020.  
531 *Burkholderia pseudomallei* as an Enteric Pathogen: Identification of Virulence Factors  
532 Mediating Gastrointestinal Infection. Infect Immun 89:e00654-20.
- 533 20. Elmore S. 2007. Apoptosis: a review of programmed cell death. Toxicol Pathol 35:495-  
534 516.
- 535 21. Mohammad-Rafiei F, Moadab F, Mahmoudi A, Navashenaq JG, Gheibihayat SM. 2023.  
536 Efferocytosis: a double-edged sword in microbial immunity. Arch Microbiol 205:370.
- 537 22. Krakauer T. 2018. Living dangerously: *Burkholderia pseudomallei* modulates phagocyte  
538 cell death to survive. Med Hypotheses 121:64-69.
- 539 23. Mariappan V, Vellasamy KM, Barathan M, Girija ASS, Shankar EM, Vadivelu J. 2021.  
540 Hijacking of the Host's Immune Surveillance Radars by *Burkholderia pseudomallei*.  
541 Front Immunol 12:718719.
- 542 24. Jitprasutwit N, Rungruengkitkun A, Lohitthai S, Reamtong O, Indrawattana N, Sookrung  
543 N, Sricharunrat T, Sukphopetch P, Chatratita N, Pumirat P. 2023. In Vitro Roles of  
544 *Burkholderia* Intracellular Motility A (BimA) in Infection of Human Neuroblastoma Cell  
545 Line. Microbiol Spectr 11:e01320-23.
- 546 25. Place DE, Christgen S, Tuladhar S, Vogel P, Malireddi RKS, Kanneganti TD. 2021.  
547 Hierarchical Cell Death Program Disrupts the Intracellular Niche Required for  
548 *Burkholderia thailandensis* Pathogenesis. mBio 12:e0105921.
- 549 26. Suparak S, Kespichayawattana W, Haque A, Easton A, Damnin S, Lertmemongkolchai G,  
550 Bancroft GJ, Korbsrisate S. 2005. Multinucleated giant cell formation and apoptosis in  
551 infected host cells is mediated by *Burkholderia pseudomallei* type III secretion protein  
552 BipB. J Bacteriol 187:6556-6560.
- 553 27. Kespichayawattana W, Rattanachetkul S, Wanun T, Utaisincharoen P, Sirisinha S. 2000.  
554 *Burkholderia pseudomallei* induces cell fusion and actin-associated membrane  
555 protrusion: a possible mechanism for cell-to-cell spreading. Infect Immun 68:5377-5384.
- 556 28. Vellasamy KM, Mariappan V, Shankar EM, Vadivelu J. 2016. *Burkholderia pseudomallei*  
557 Differentially Regulates Host Innate Immune Response Genes for Intracellular Survival  
558 in Lung Epithelial Cells. PLoS Negl Trop Dis 10:e0004730.
- 559 29. Wang Y, Kanneganti T-D. 2021. From pyroptosis, apoptosis and necroptosis to  
560 PANoptosis: A mechanistic compendium of programmed cell death pathways. Comput  
561 Struct Biotechnol J 19:4641-4657.
- 562 30. Murray PJ. 2017. Macrophage Polarization. Annu Rev Physiol 79:541-566.
- 563 31. Stockton JL, Khakhum N, Stevenson HL, Torres AG. 2023. *Burkholderia pseudomallei*  
564 BicA protein promotes pathogenicity in macrophages by regulating invasion, intracellular  
565 survival, and virulence. mSphere 8:e0037823.
- 566 32. Thiriort JD, Martinez-Martinez YB, Endsley JJ, Torres AG. 2020. Hacking the host:  
567 exploitation of macrophage polarization by intracellular bacterial pathogens. Pathog Dis  
568 78:ftaa009.

- 569 33. Misharin AV, Morales-Nebreda L, Mutlu GM, Budinger GR, Perlman H. 2013. Flow  
570 cytometric analysis of macrophages and dendritic cell subsets in the mouse lung. . Am J  
571 Respir Cell Mol Biol 49:503-510.
- 572 34. Zhang C, Yang M, Ericsson AC. 2021. Function of Macrophages in Disease: Current  
573 Understanding on Molecular Mechanisms. Front Immunol 12:620510.
- 574 35. Burtnick MN, Brett PJ, Nair V, Warawa JM, Woods DE, Gherardini FC. 2008.  
575 *Burkholderia pseudomallei* type III secretion system mutants exhibit delayed vacuolar  
576 escape phenotypes in RAW 264.7 murine macrophages. Infect Immun 76:2991-3000.
- 577 36. Ceballos-Olvera I, Sahoo M, Miller MA, Del Barrio L, Re F. 2011. Inflammasome-  
578 dependent pyroptosis and IL-18 protect against *Burkholderia pseudomallei* lung infection  
579 while IL-1 $\beta$  is deleterious. PLoS Pathog 7:e1002452.
- 580 37. Amemiya K, Dankmeyer JL, Bearss JJ, Zeng X, Stonier SW, Soffler C, Cote CK, Welkos  
581 SL, Fetterer DP, Chance TB, Trevino SR, Worsham PL, Waag DM. 2020. Dysregulation  
582 of TNF- $\alpha$  and IFN- $\gamma$  expression is a common host immune response in a chronically  
583 infected mouse model of melioidosis when comparing multiple human strains of  
584 *Burkholderia pseudomallei*. BMC Immunol 21:5.
- 585 38. Li H, Zhu H, Xu CJ, Yuan J. 1998. Cleavage of BID by caspase 8 mediates the  
586 mitochondrial damage in the Fas pathway of apoptosis. Cell 94:491-501.
- 587 39. Luo X, Budihardjo I, Zou H, Slaughter C, Wang X. 1998. Bid, a Bcl2 interacting protein,  
588 mediates cytochrome c release from mitochondria in response to activation of cell surface  
589 death receptors. Cell 94:481-490.
- 590 40. Doran AC, Yurdagul A, Tabas I. 2020. Efferocytosis in health and disease. Nat Rev  
591 Immunol 20:254-267.
- 592 41. Savelkoel J, Tiemensma M, Birnie E, Wiersinga WJ, Currie BJ, Roelofs JJTH. 2023. A  
593 Graphical Overview of the Histopathology of Human Melioidosis: A Case Series. Open  
594 Forum Infect Dis 10:ofad367.
- 595 42. Khakhum N, Bharaj P, Myers JN, Tapia D, Kilgore PB, Ross BN, Walker DH, Endsley  
596 JJ, Torres AG. 2019. *Burkholderia pseudomallei*  $\Delta$ tonB  $\Delta$ hcp1 Live Attenuated Vaccine  
597 Strain Elicits Full Protective Immunity against Aerosolized Melioidosis Infection.  
598 mSphere 4:e00570-18.  
599
- 600

601 **Figure Legends**

602 **Figure 1: Intracellular survival of *Bpm* in macrophages is not T6SS-dependent.** RAW 264.7  
603 cells (A) or BALB/c BMDMs (B), were infected at an MOI of 10 with *Bpm* K96243 WT,  $\Delta hcp1$ ,  
604 or  $\Delta hcp1::hcp1$  and bacteria enumerated at 3, 6, and 12 hpi to assess intracellular replication.  
605 Bars represent an average of two independent experiments performed in triplicate  $\pm$  SD.  
606 Significant differences were assessed via one-way ANOVA followed by Tukey's multiple  
607 comparison test.  $p < 0.05$  \*,  $p < 0.01$  \*\*,  $p < 0.005$  \*\*\*,  $p < 0.0001$  \*\*\*\*.

608  
609 **Figure 2: Functional T6SS exacerbates apoptosis in macrophages during infection.** RAW  
610 264.7 cells were infected at an MOI of 10 with *Bpm* K96243 WT,  $\Delta hcp1$ ,  $\Delta hcp1::hcp1$ , or mock  
611 infected and collected at 3 (A), 6 (B), 8 (C), or 12 (D) hpi. Cells were evaluated for apoptosis via  
612 staining with Apotracker Green and Zombie NIR (Live/Dead). Percentage of apoptotic cells were  
613 counted as Apotracker+ and L/D+/- (Q2 & Q3) (E). Bars represent an average of three  
614 independent experiments performed in duplicate  $\pm$  SD. Significant differences were assessed via  
615 one-way ANOVA followed by Tukey's multiple comparison test.  $p < 0.05$  \*,  $p < 0.01$  \*\*,  $p <$   
616  $0.005$  \*\*\*,  $p < 0.0001$  \*\*\*\*.

617  
618 **Figure 3: The  $\Delta hcp1$  strain is attenuated in the intranasal melioidosis model.** BALB/c mice  
619 ( $n = 5$ /group) were intranasally challenged with 3-5 LD<sub>50</sub> of *Bpm* K96243 WT,  $\Delta hcp1$ , or  
620  $\Delta hcp1::hcp1$  (1 LD<sub>50</sub> ~ 312 CFU) and monitored for 21 days post infection for survival (A) and  
621 weight loss (B). Animals were euthanized once the humane endpoint threshold was reached. On  
622 day 21 post infection,  $\Delta hcp1$  survivors were euthanized and lungs, liver, and spleen were  
623 homogenized for bacterial enumeration (C). Error bars in (B) represent SEM and lines in (C)  
624 represent median value.

625  
626 **Figure 4: Pulmonary apoptosis mirrors *in vitro* *Bpm* T6SS-mediated exacerbation.** BALB/c  
627 mice ( $n = 5$ /group) were intranasally challenged with 3-5 LD<sub>50</sub> of *Bpm* K96243 WT,  $\Delta hcp1$ , or  
628  $\Delta hcp1::hcp1$  (1 LD<sub>50</sub> ~ 312 CFU) and at 48 h post-infection lungs were harvested, formalin  
629 fixed, and mounted on slides. Sections were stained with TUNEL (red) and Hoescht 33342 (blue)  
630 to evaluate apoptosis in the lungs.

631

632 **Figure 5: The *Bpm* T6SS does not contribute to differential macrophage polarization *in***  
633 ***vitro*.** RAW 264.7 cells were infected at an MOI of 10 with *Bpm* K96243 WT,  $\Delta hcp1$ ,  
634  $\Delta hcp1::hcp1$ , or mock infected and collected at 8 hpi. Cells were processed, stained, and  
635 evaluated for expression of M2 (A & C) and M1 (B & D) markers. Cells that were Arg-1+ are  
636 denoted as M2 while CD80+ cells are M1. Bars represent an average of three independent  
637 experiments performed in duplicate  $\pm$  SD. Significant differences were assessed via one-way  
638 ANOVA followed by Tukey's multiple comparison test. ns; non-significance,  $p < 0.05$  \*,  $p <$   
639  $0.01$  \*\*,  $p < 0.005$  \*\*\*,  $p < 0.0001$  \*\*\*\*.

640

641 **Figure 6: M2 polarization promotes *Bpm* intracellular survival.** RAW 264.7 cells were pre-  
642 polarized with IFN $\gamma$  + LPS (M1), IL-4 (M2), or media control (M0) and infected at an MOI of 10  
643 with *Bpm* K96243. Phagocytic capacity of M1 and M2 macrophages was compared to M0 and  
644 relative phagocytic capacity was measured (A). Intracellular survival was evaluated at 3 hpi (B).  
645 Bars represent an average of two independent experiments performed in triplicate  $\pm$  SD.  
646 Significant differences were assessed via one-way ANOVA followed by Tukey's multiple  
647 comparison test. ns; non-significance,  $p < 0.05$  \*,  $p < 0.01$  \*\*,  $p < 0.005$  \*\*\*,  $p < 0.0001$  \*\*\*\*.

648

649 **Figure 7: M2 polarization is not T6SS-dependent *in vivo*.** BALB/c mice (n = 5/group) were  
650 intranasally challenged with 3-5 LD<sub>50</sub> of *Bpm* K96243 WT,  $\Delta hcp1$ , or  $\Delta hcp1::hcp1$  (1 LD<sub>50</sub> ~  
651 312 CFU) and at 48 hpi lungs were harvested and processed for flow cytometry. A  
652 comprehensive gating strategy (Fig S1) was used to filter and evaluate macrophages within the  
653 lungs (A). Total pulmonary macrophages: MHCII+ F4/80+ (B), M1: CD80+ CD86+/- (C), and  
654 M2: Arg-1+ CD163+ (D) were assessed. Significant differences were assessed via one-way  
655 ANOVA followed by Tukey's multiple comparison test. ns; non-significance.  $p < 0.05$  \*,  $p <$   
656  $0.01$  \*\*,  $p < 0.005$  \*\*\*,  $p < 0.0001$  \*\*\*\*.

657

658 **Figure 8: Inflammatory nodule formation is not contingent on T6SS.** BALB/c mice (n =  
659 5/group) were intranasally challenged with 3-5 LD<sub>50</sub> of *Bpm* K96243 WT,  $\Delta hcp1$ , or  
660  $\Delta hcp1::hcp1$  (1 LD<sub>50</sub> ~ 312 CFU) and at 48 hpi lungs were harvested, formalin fixed, and  
661 mounted on slides before hematoxylin and eosin staining. Representative images were taken  
662 using a 10x microscope objective.



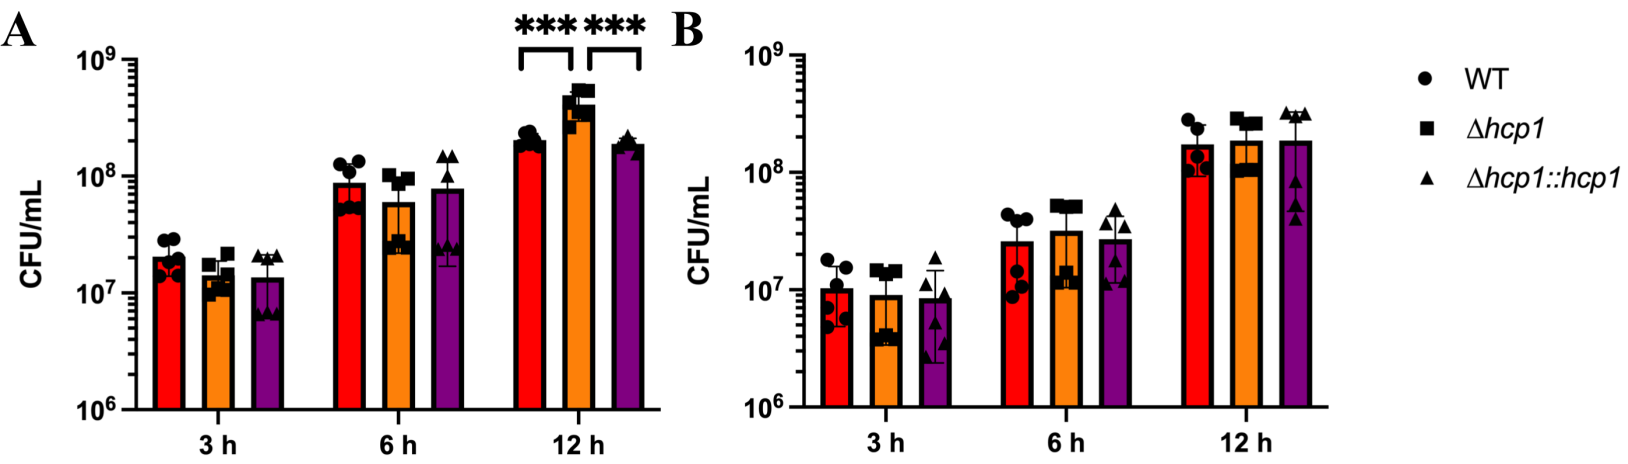



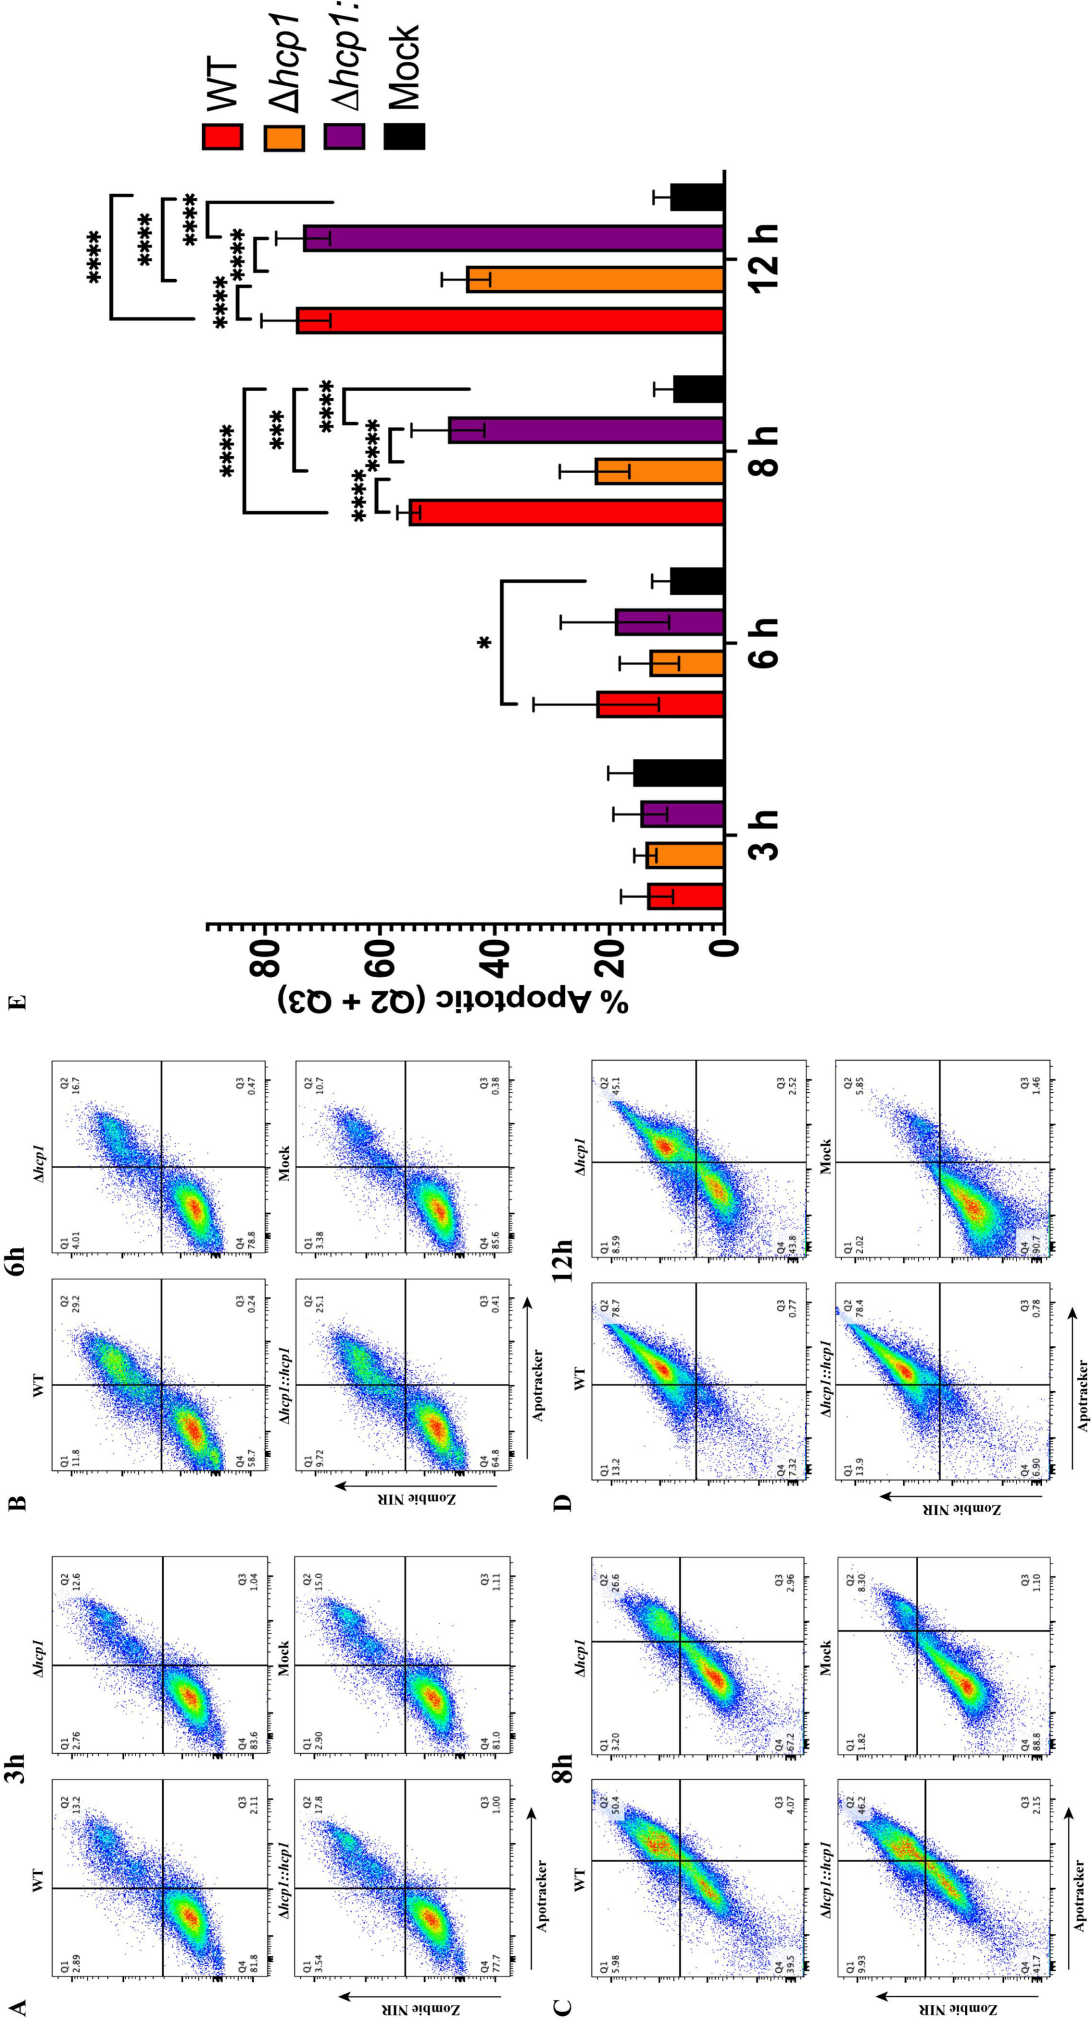

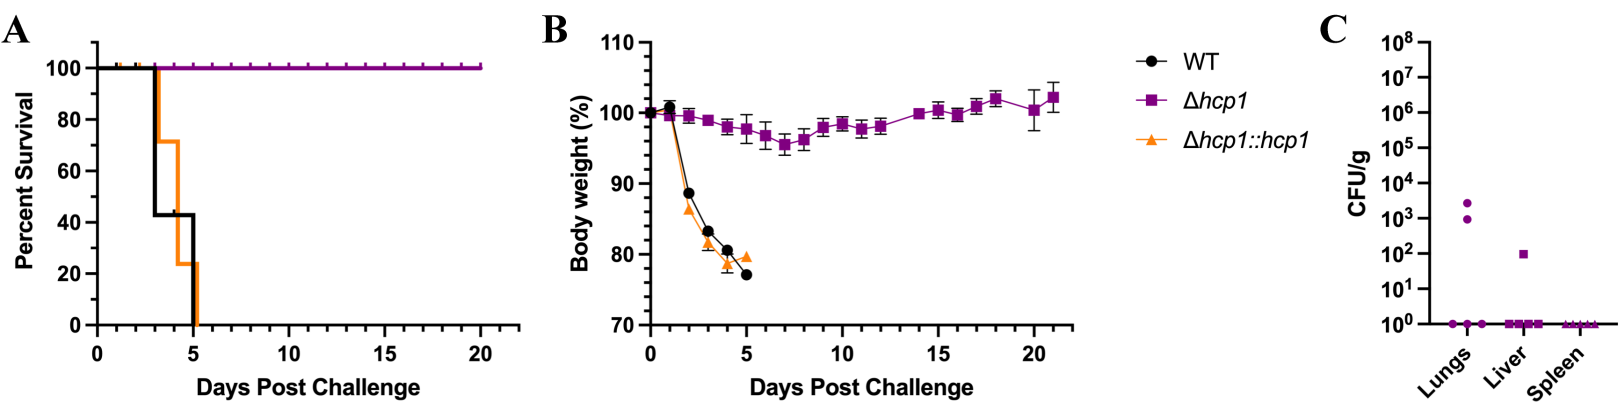

*Δhcp1::hcp1*

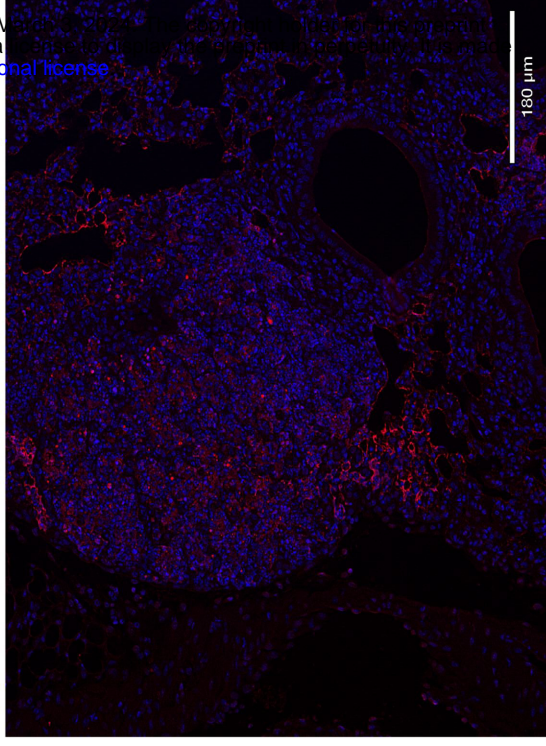

*Δhcp1*

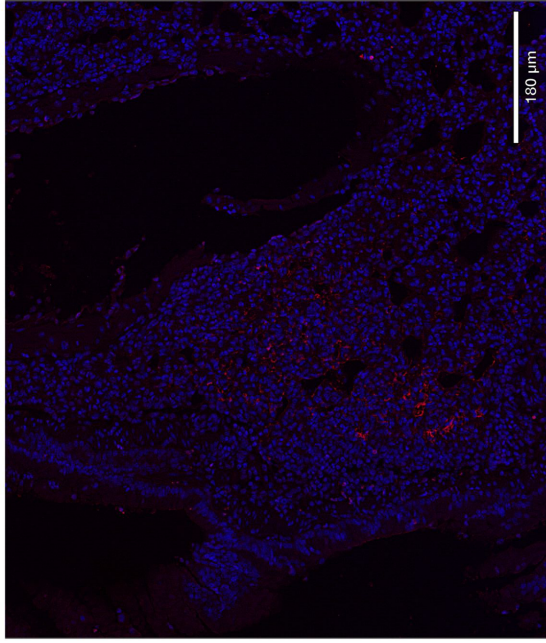

WT

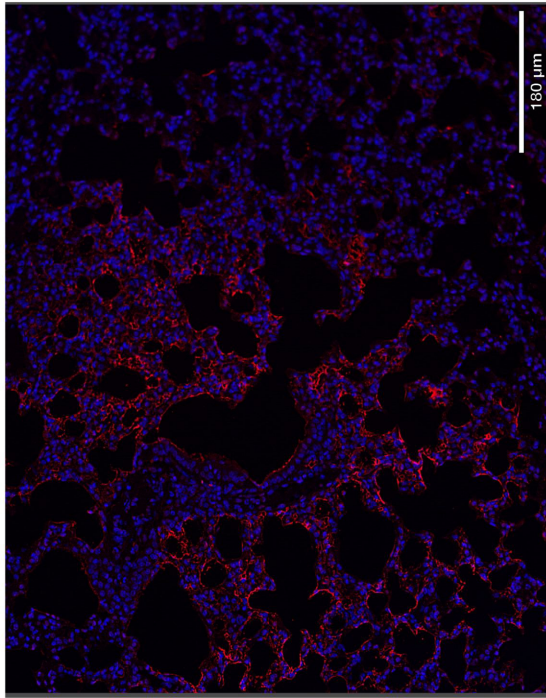

**DNA-TUNNEL**

**C**

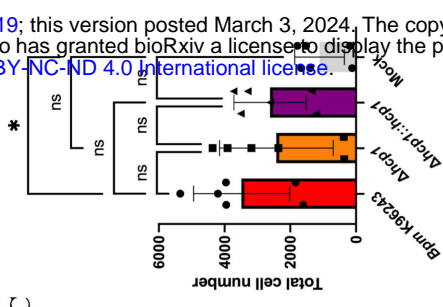

**D**

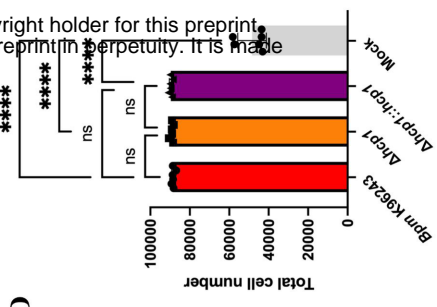

**B**

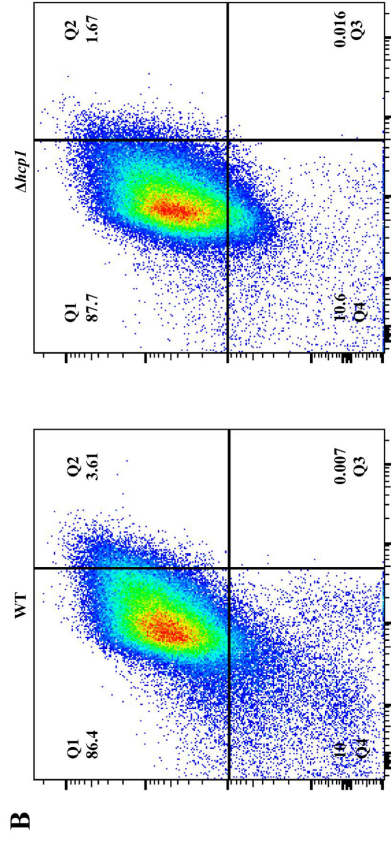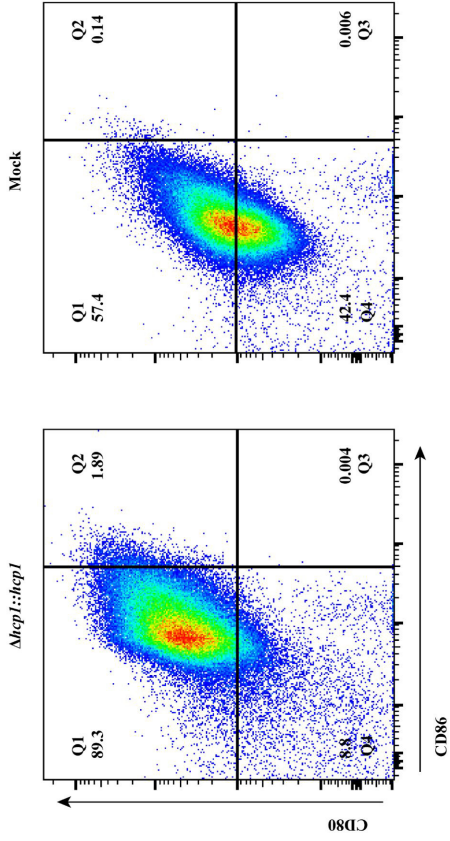

**A**

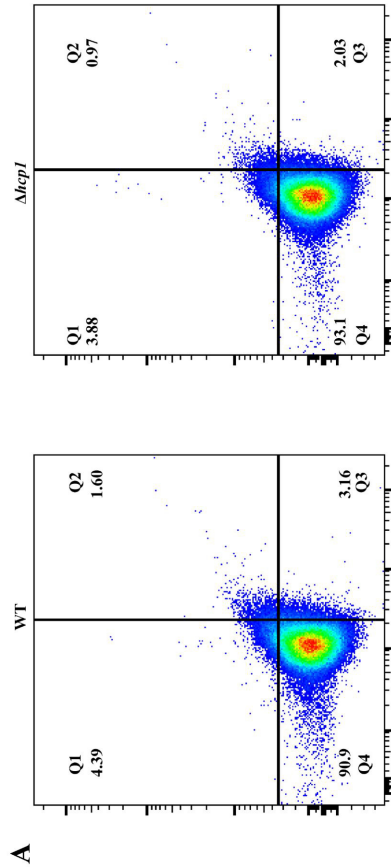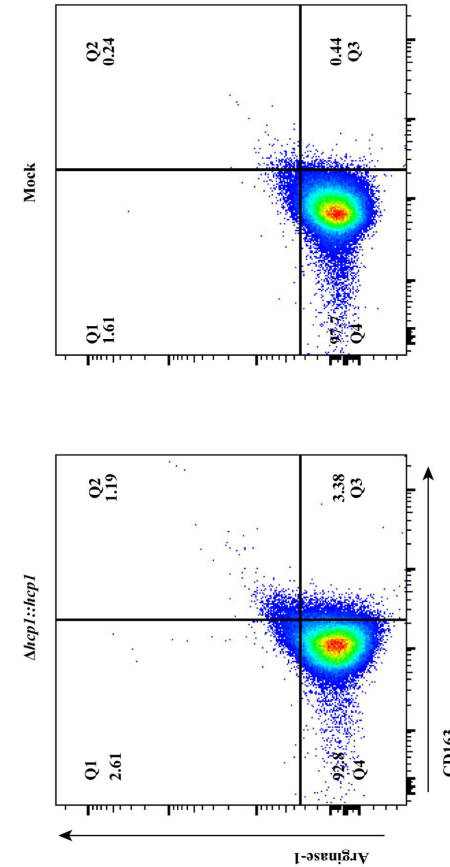

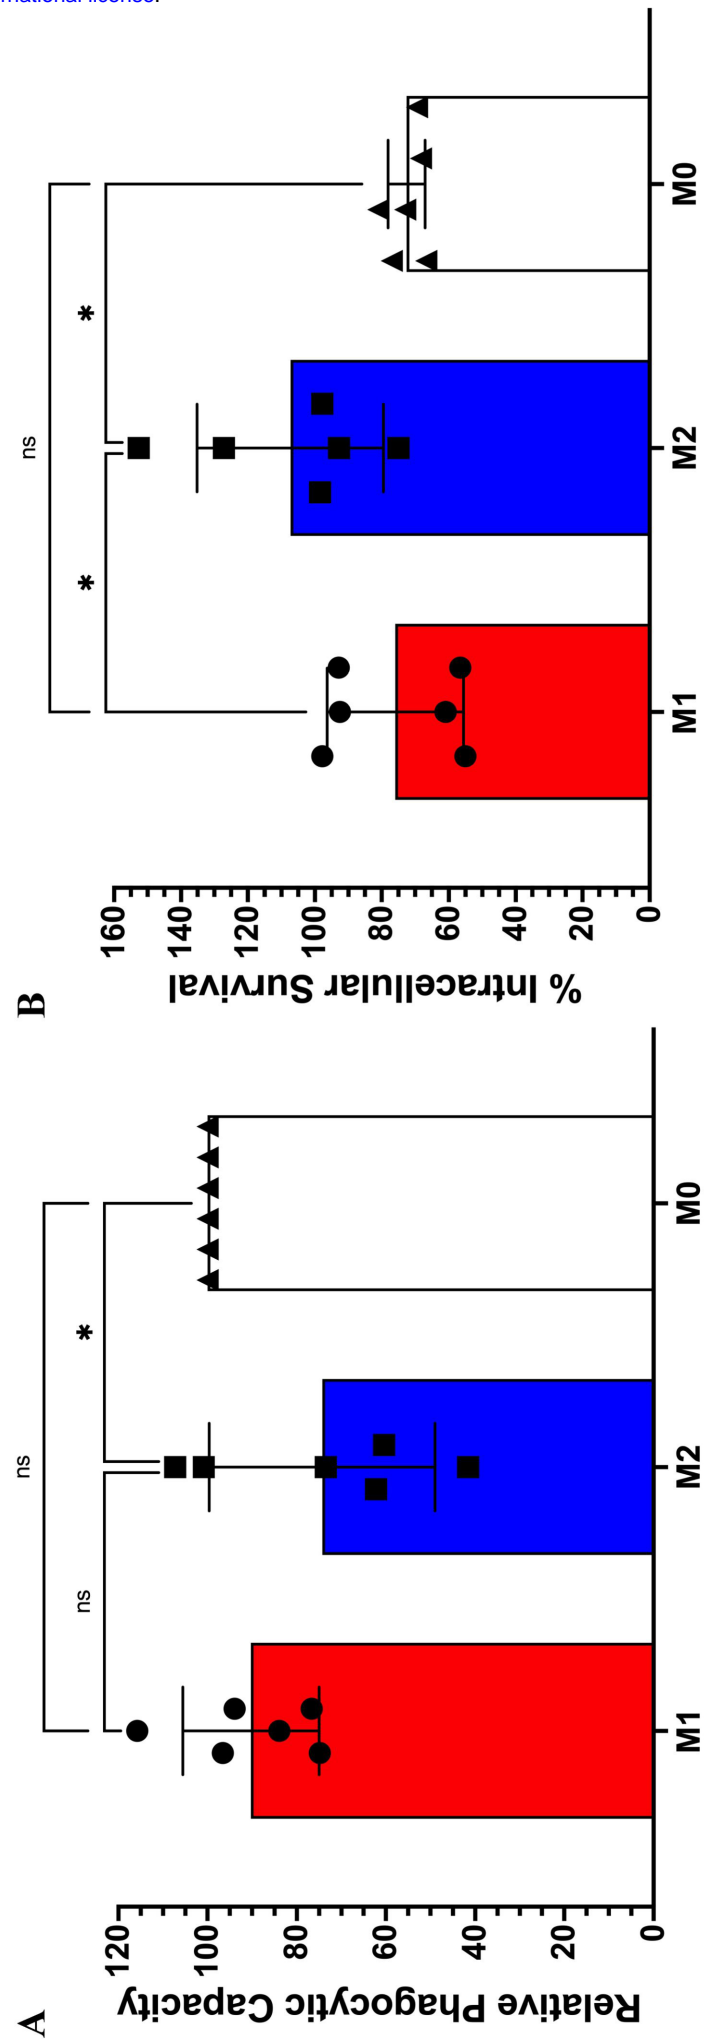

**B**

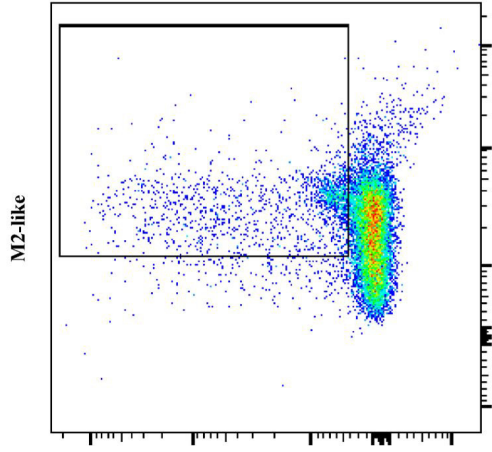

M1-like

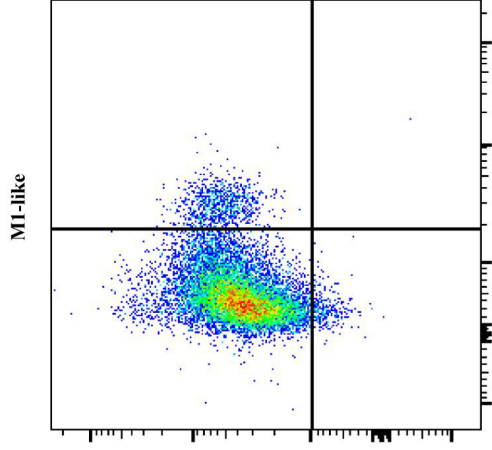

Total Macrophages

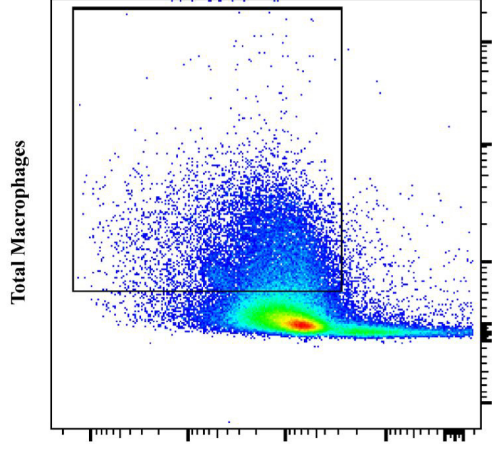

WT

**C**

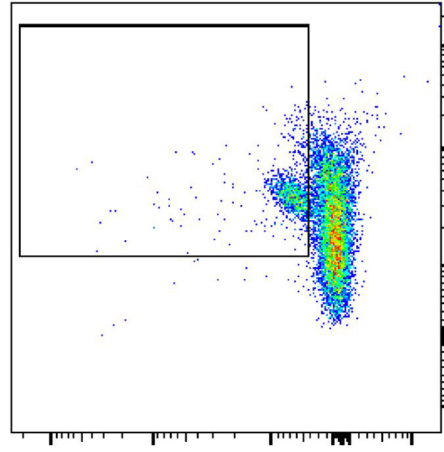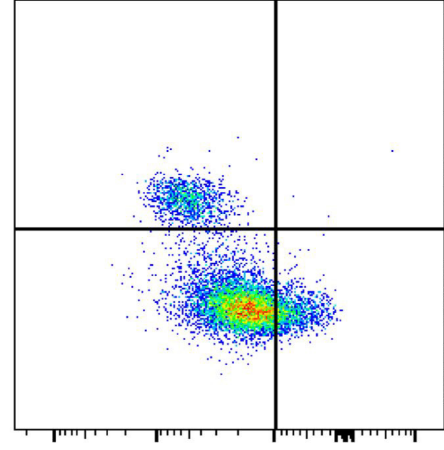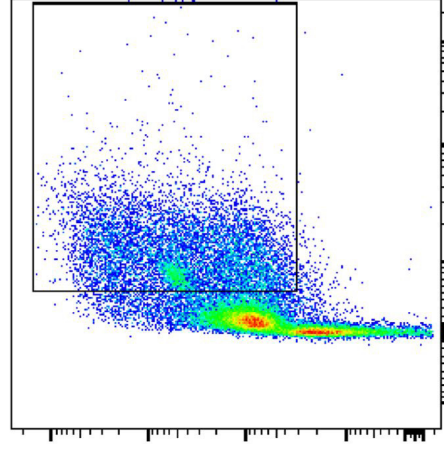

$\Delta hcp1$

**D**

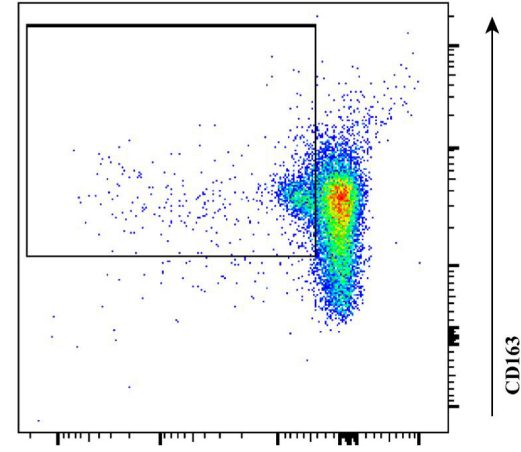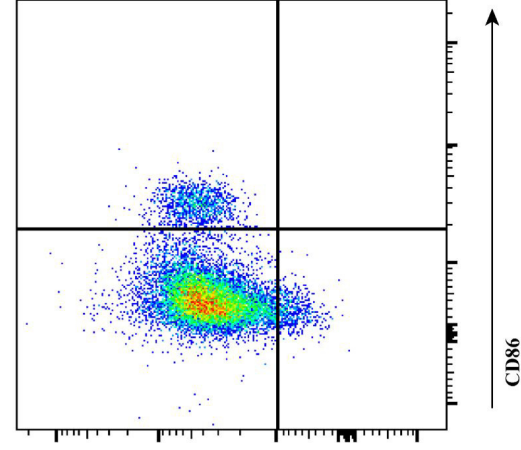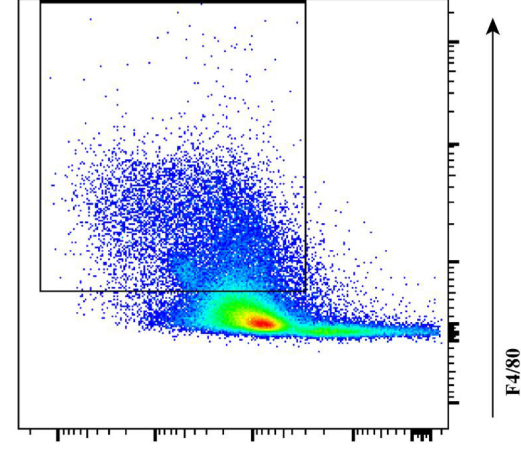

$\Delta hcp1::hcp1$

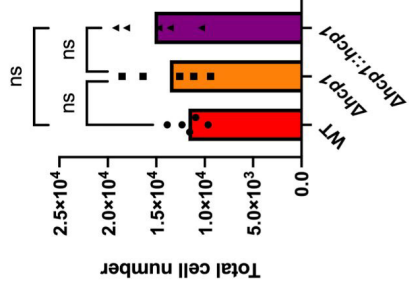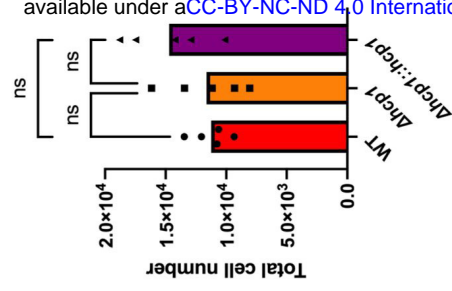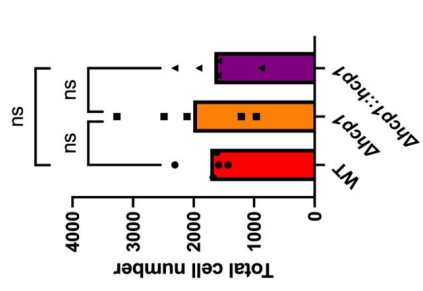

*Δhcp1::hcp1*

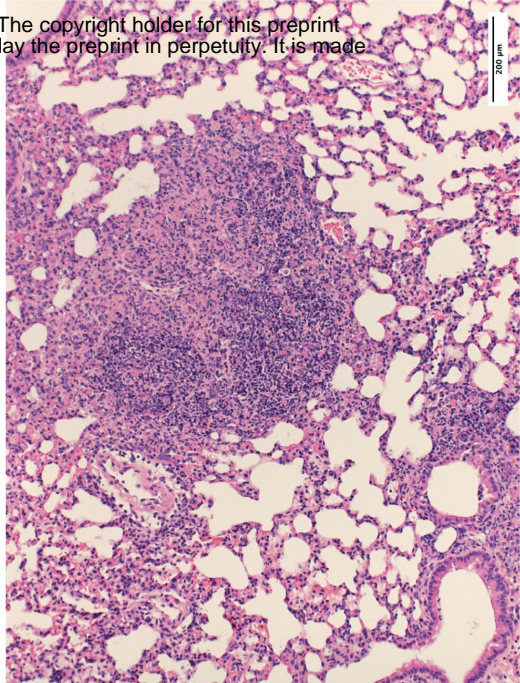

*Δhcp1*

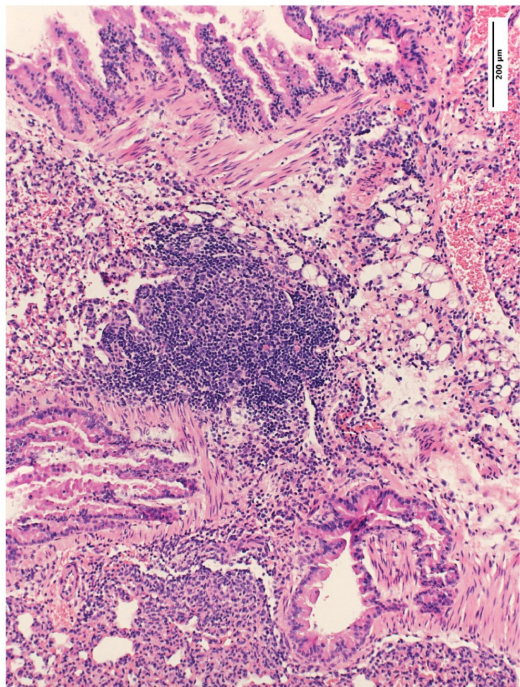

WT

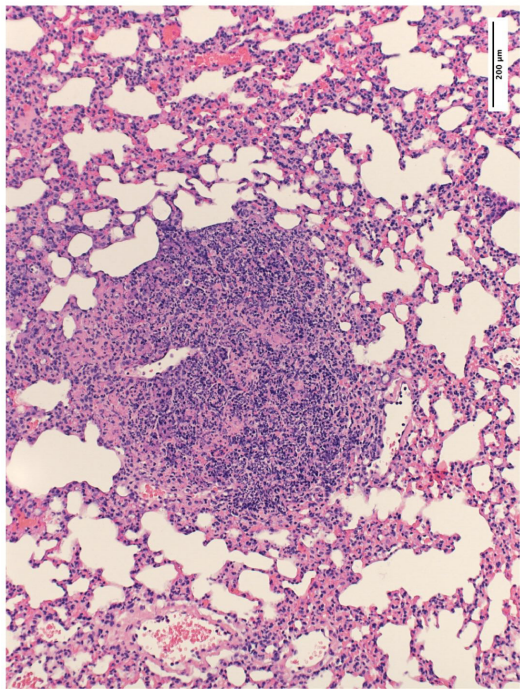

Source: https://www.biorxiv.org/content/biorxiv/early/2024/03/03/2024.03.01.583019.full.pdf
